# Supplementary material for: The adsorption mechanisms of ClO4− onto highly graphited and hydrophobic porous carbonaceous materials from biomass
Source: Royal Society of Chemistry journal article supplement (doi:10.1039/c6ra13341j), 2016-01-01
Supplement: c6ra13341j1.pdf [file c6ra13341j1.pdf]

## Supporting Information Section for Chemical Engineering Journal

### The adsorption mechanisms of $ClO_4^-$ onto highly graphited and hydrophobic porous carbonaceous material from Biomass

Bibo Xu<sup>a,b</sup>, Yunbo Zhai<sup>a,b,\*</sup>, Yun Zhu<sup>c</sup>, Chuan Peng<sup>a,b</sup>, Tengfei Wang<sup>a,b</sup>, Chen Zhang<sup>a,b</sup>, Caiting Li<sup>a,b</sup>, Guangming Zeng<sup>a,b</sup>

<sup>a</sup> College of Environmental Science and Engineering, Hunan University, Changsha 410082, P. R. China

<sup>b</sup> Key Laboratory of Environmental Biology and Pollution Control (Hunan University), Ministry of Education, Changsha 410082, P. R. China

<sup>c</sup> Office of Scientific R&D, Hunan University, Changsha 410082, P. R. China

---

\* Corresponding Author. Tel.+86 731 8882 2829, Fax. +86 731 8882 2829.  
E-mail Address: [ybzhai@hnu.edu.cn](mailto:ybzhai@hnu.edu.cn) (Y.B. ZHAI)

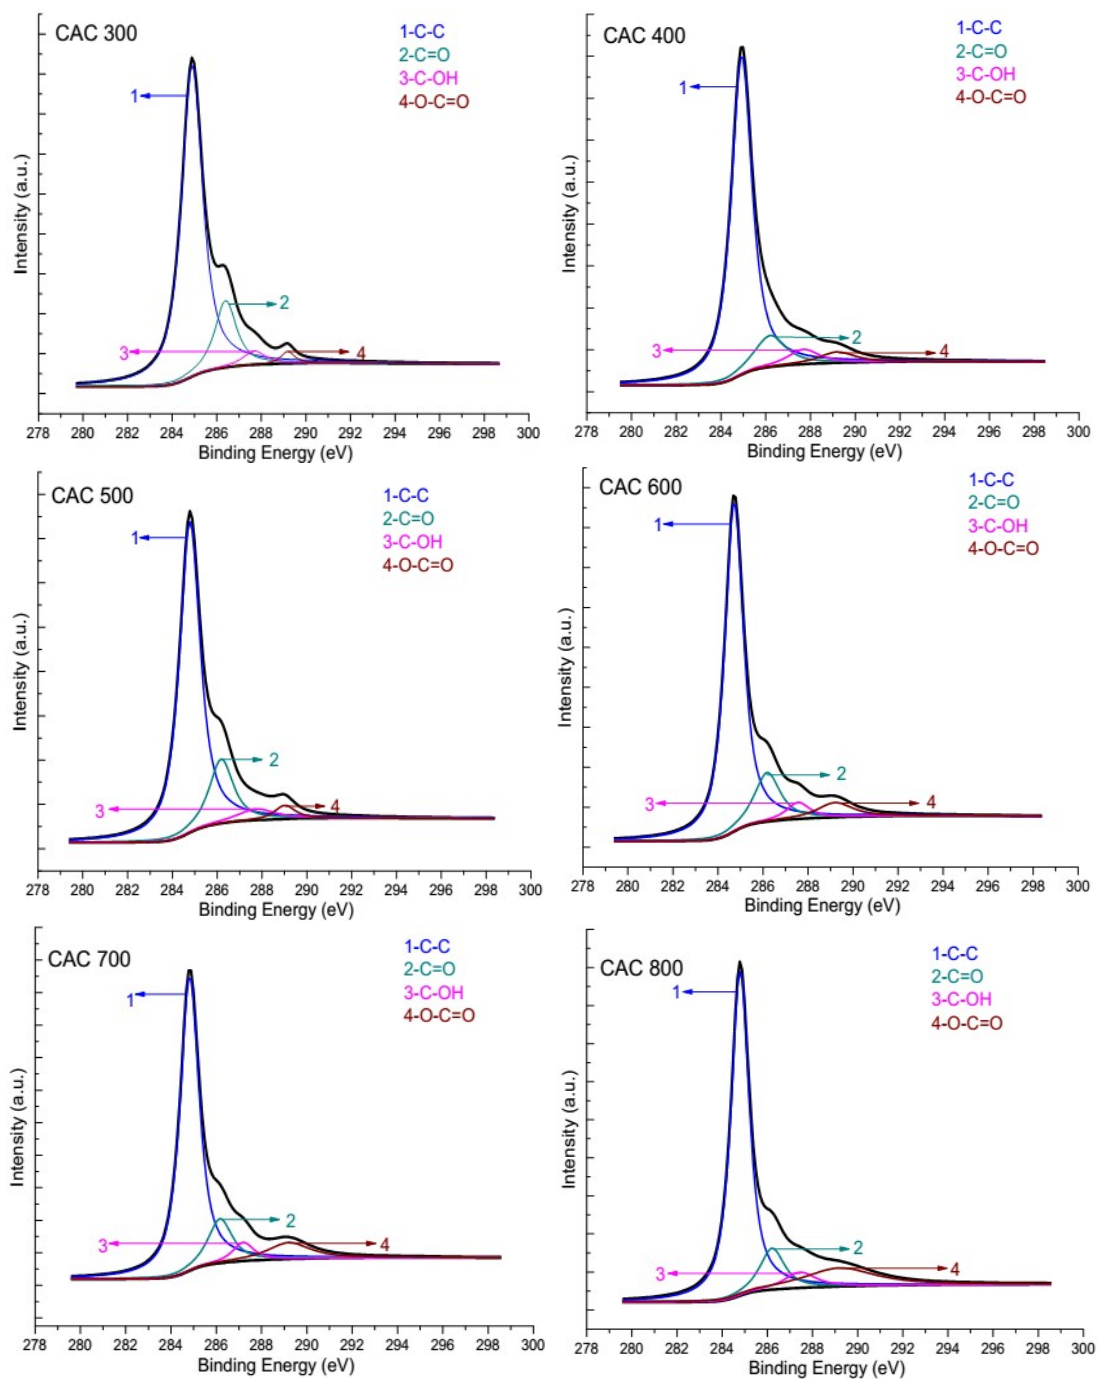

**Figure S-1. C 1s high-resolution XPS spectra of CACs.**

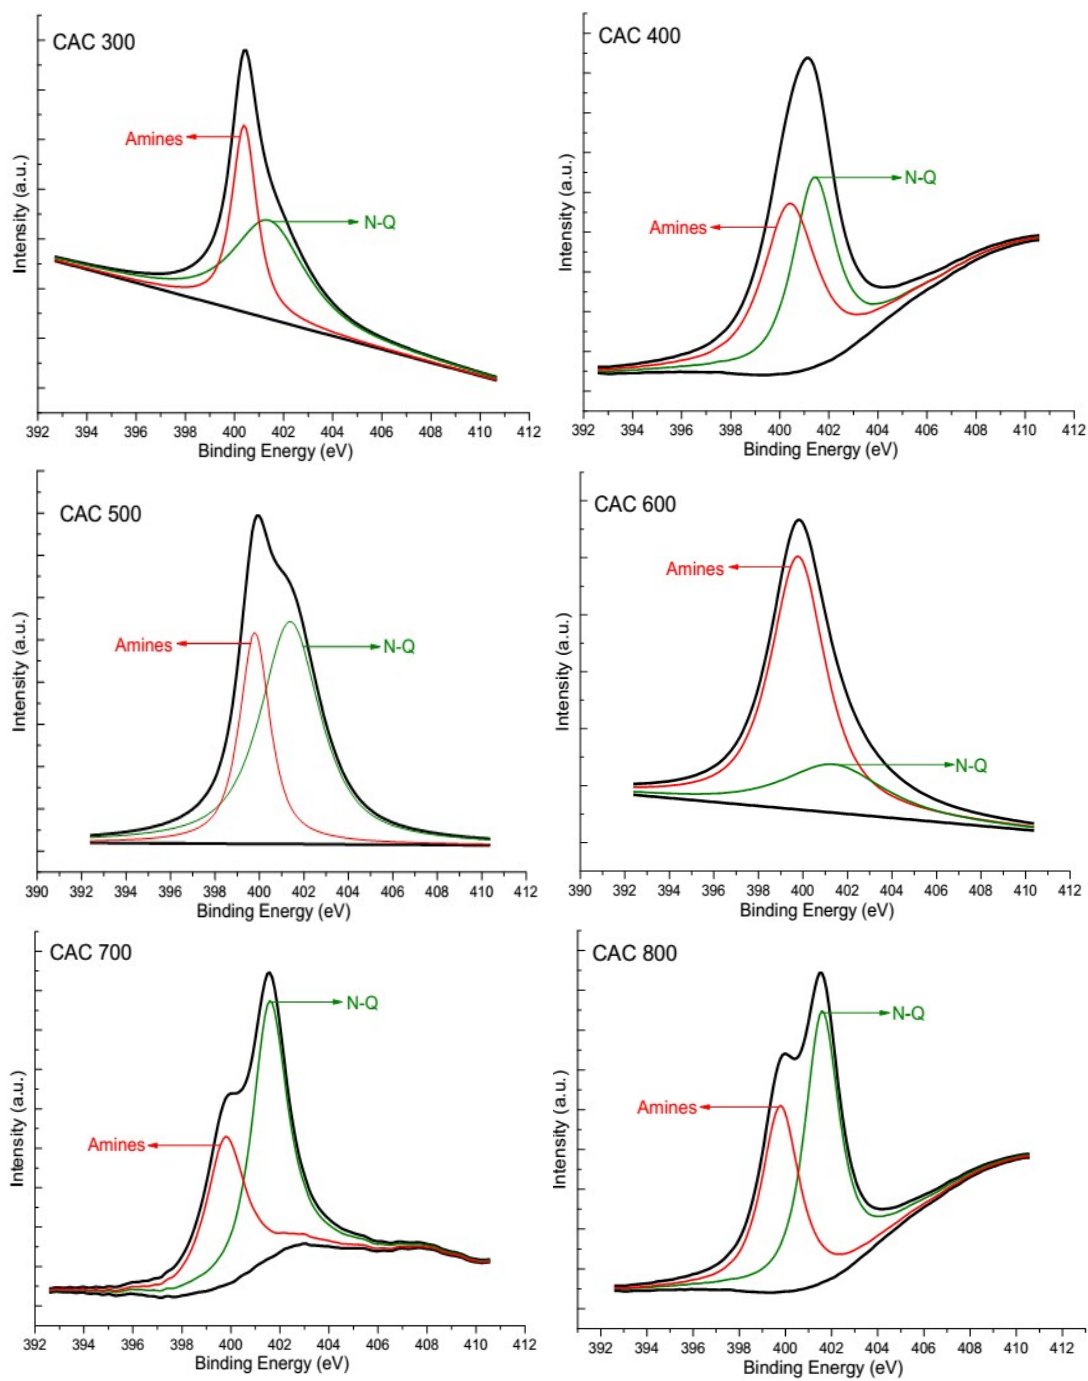

**Figure S-2. N 1s high-resolution XPS spectra of CACs.**

**Table S-1. The maximum adsorption capacity correlation between surface area, N, the ratio of O/C, the content of -COH and -COOH and the ratio of I<sub>D</sub>/I<sub>G</sub>.**

|                                    |                        | Surface area | N     | O/C      | The content of -COH<br>and -COOH | The ratio of<br>I <sub>D</sub> /I <sub>G</sub> |
|------------------------------------|------------------------|--------------|-------|----------|----------------------------------|------------------------------------------------|
| The maximum<br>adsorption capacity | Pearson<br>Correlation | 0.877*       | 0.700 | -0.988** | 0.876*                           | -0.980**                                       |
|                                    | Sig. (2-tailed)        | 0.022        | 0.121 | 0.000    | 0.022                            | 0.001                                          |

\* Correlation is Significant at the level 0.05 (2-tailed).

\*\* Correlation is Significant at the level 0.01 (2-tailed).
